# Supplementary material for: Orientations and Proximities of the Extracellular Ends of Transmembrane Helices S0 and S4 in Open and Closed BK Potassium Channels
Source: PubMed Central journal article supplement (PMC3589268; doi:10.1371/journal.pone.0058335), 2013-03-05
Supplement: pone.0058335.s002.pdf [file pone.0058335.s002.pdf]

|             | <b>S0</b> | M21         | W22         | W23         | A24         | <b>MEAN</b> | SD   |
|-------------|-----------|-------------|-------------|-------------|-------------|-------------|------|
| <b>S4</b>   |           |             |             |             |             |             |      |
| W203        |           | 0.62        | 0.72        | 0.39        | 0.49        | <b>0.56</b> | 0.14 |
| L204        |           | 0.37        | 0.51        | 0.12        | 0.12        | <b>0.28</b> | 0.19 |
| G205        |           | 0.43        | 0.63        | -0.04       | 0.04        | <b>0.27</b> | 0.32 |
| I206        |           | 0.04        | 0.12        | -0.05       | 0.05        | <b>0.04</b> | 0.07 |
| <b>MEAN</b> |           | <b>0.37</b> | <b>0.50</b> | <b>0.11</b> | <b>0.18</b> |             |      |
| SD          |           | 0.24        | 0.26        | 0.21        | 0.21        |             |      |

Table S1. Extents of disulfide crosslinking of S0 to S4. The residues substituted by Cys are shown.
